# Supplementary material for: Compendiums of cancer transcriptomes for machine learning applications
Source: PubMed Central journal article supplement (PMC6783425; doi:10.1038/s41597-019-0207-2), 2019-10-08
Supplement: 41597_2019_207_MOESM1_ESM.pdf [file 41597_2019_207_MOESM1_ESM.pdf]

## Supplementary Figure

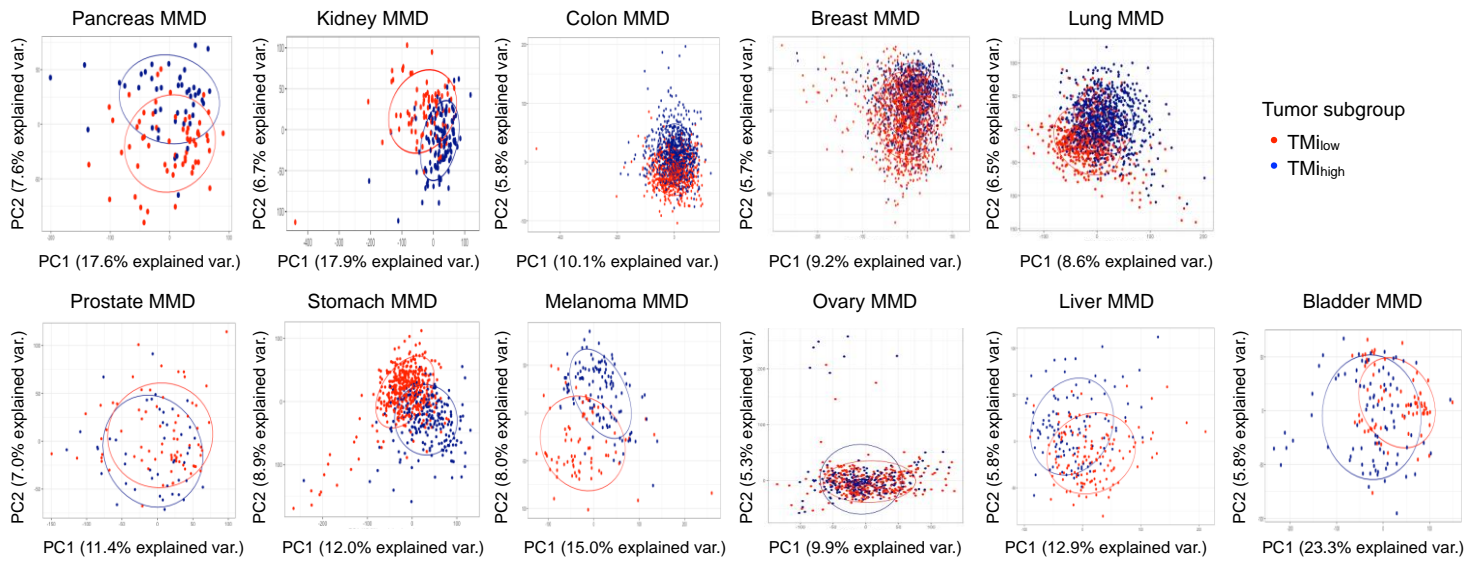

**Fig. S1. PCA of TT subgroups.** All TT samples in MMDs were stratified into TMI<sub>low</sub> and TMI<sub>high</sub> groups based on 29-gene matresome expression (see Methods). The first two PCs capturing the most variance are shown. Ellipses are drawn one standard deviation away from the mean of the Gaussian fitted to each MMD.

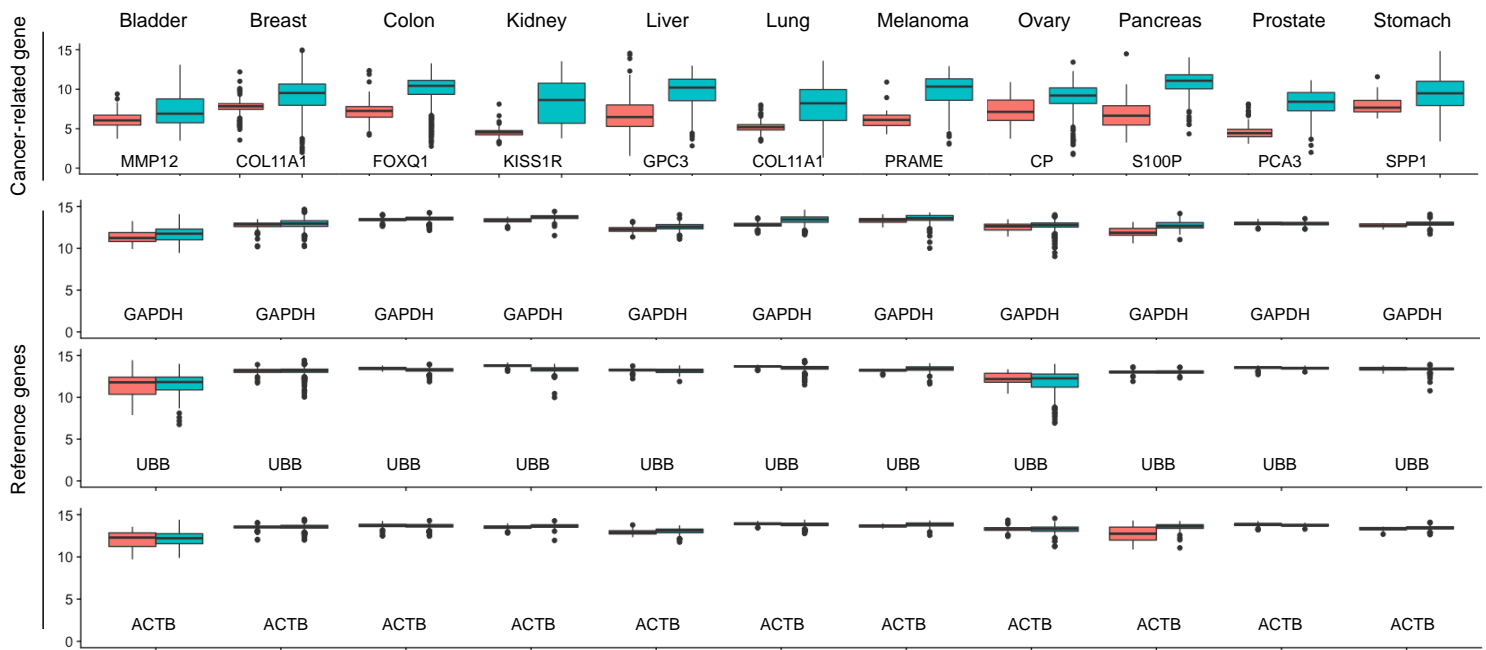

**Fig. S2. Box plots comparing the expression of cancer-related genes and reference genes between NT and TT samples.** Box hinges represent 1<sup>st</sup> and 3<sup>rd</sup> quartiles, and middle represents the median. The upper and lower whiskers extend from hinges up and down indicate the most extreme values that are within 1.5\*IQR (interquartile range) of the respective hinge. Red and blue boxes represent non-tumor (NT) and tumor tissue (TT) samples, respectively.

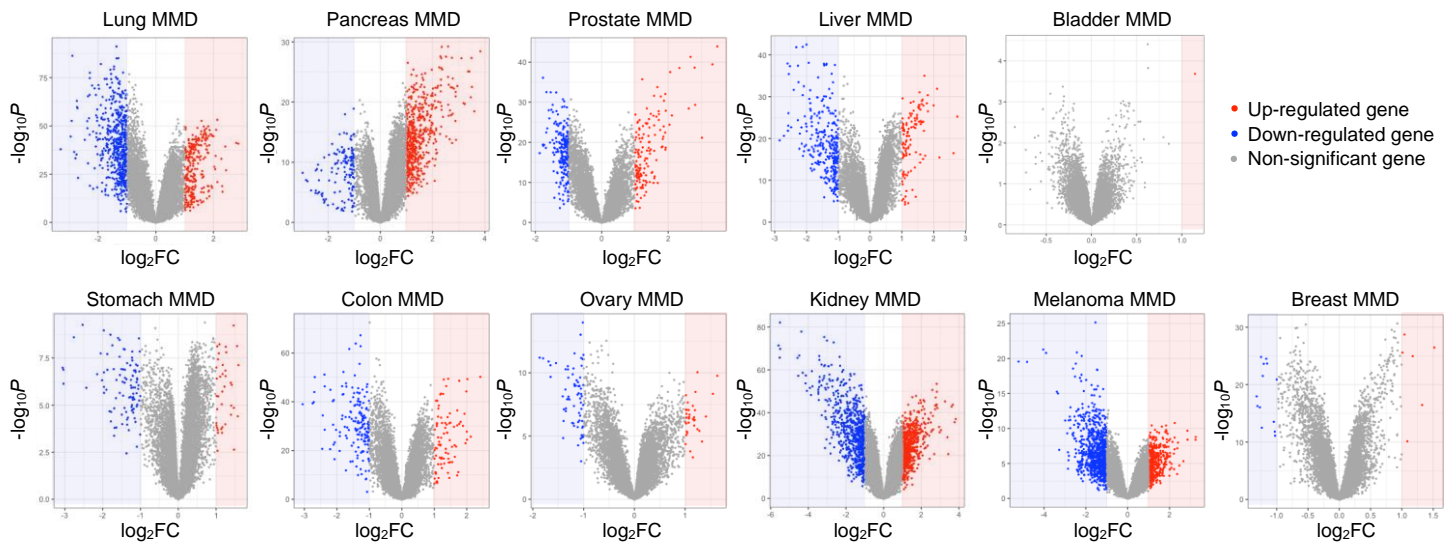

**Fig. S3. Differential expression analysis.** Up-regulated and down-regulated genes with absolute values of log<sub>2</sub> fold-change > 1 and LIMMA-derived adjusted P-value < 0.001 in TT samples relative to NT samples are shown in red and blue, respectively. Gray dots represent statistically non-significant genes.

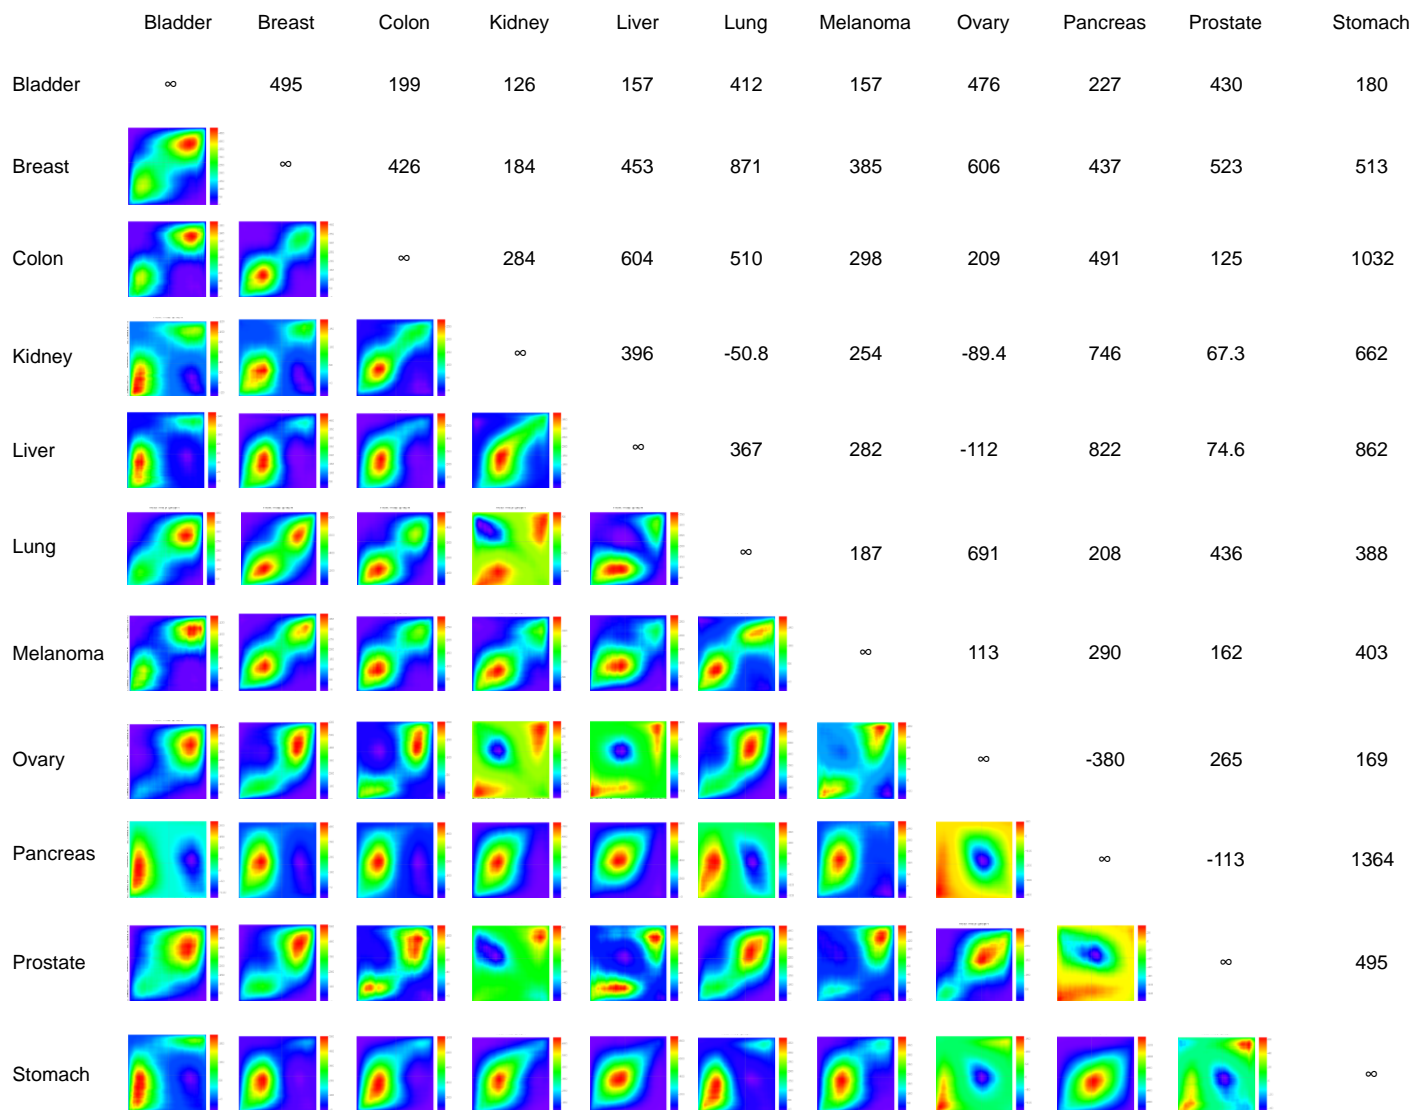

**Fig. S4. Cross-cancer analysis.** Lists of genes ranked by DE between TT and NT groups were used to generate RRHO heatmaps. RRHO map max values, denoted as max, are stated.

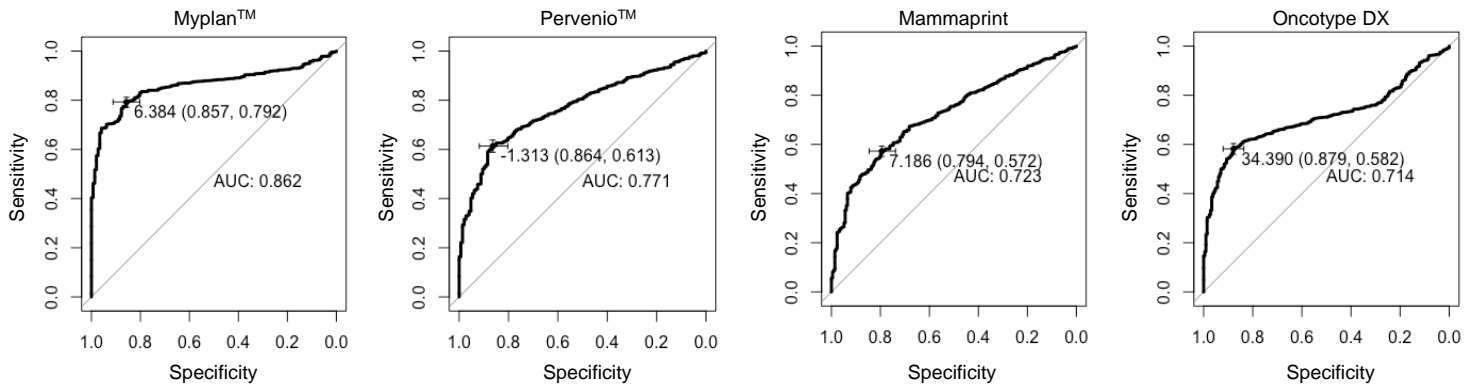

**Fig. S5. ROC analysis.** The optimal cutoff, specificity, sensitivity, and the area under the ROC curve (AUC) are stated for each multi-gene classifier.

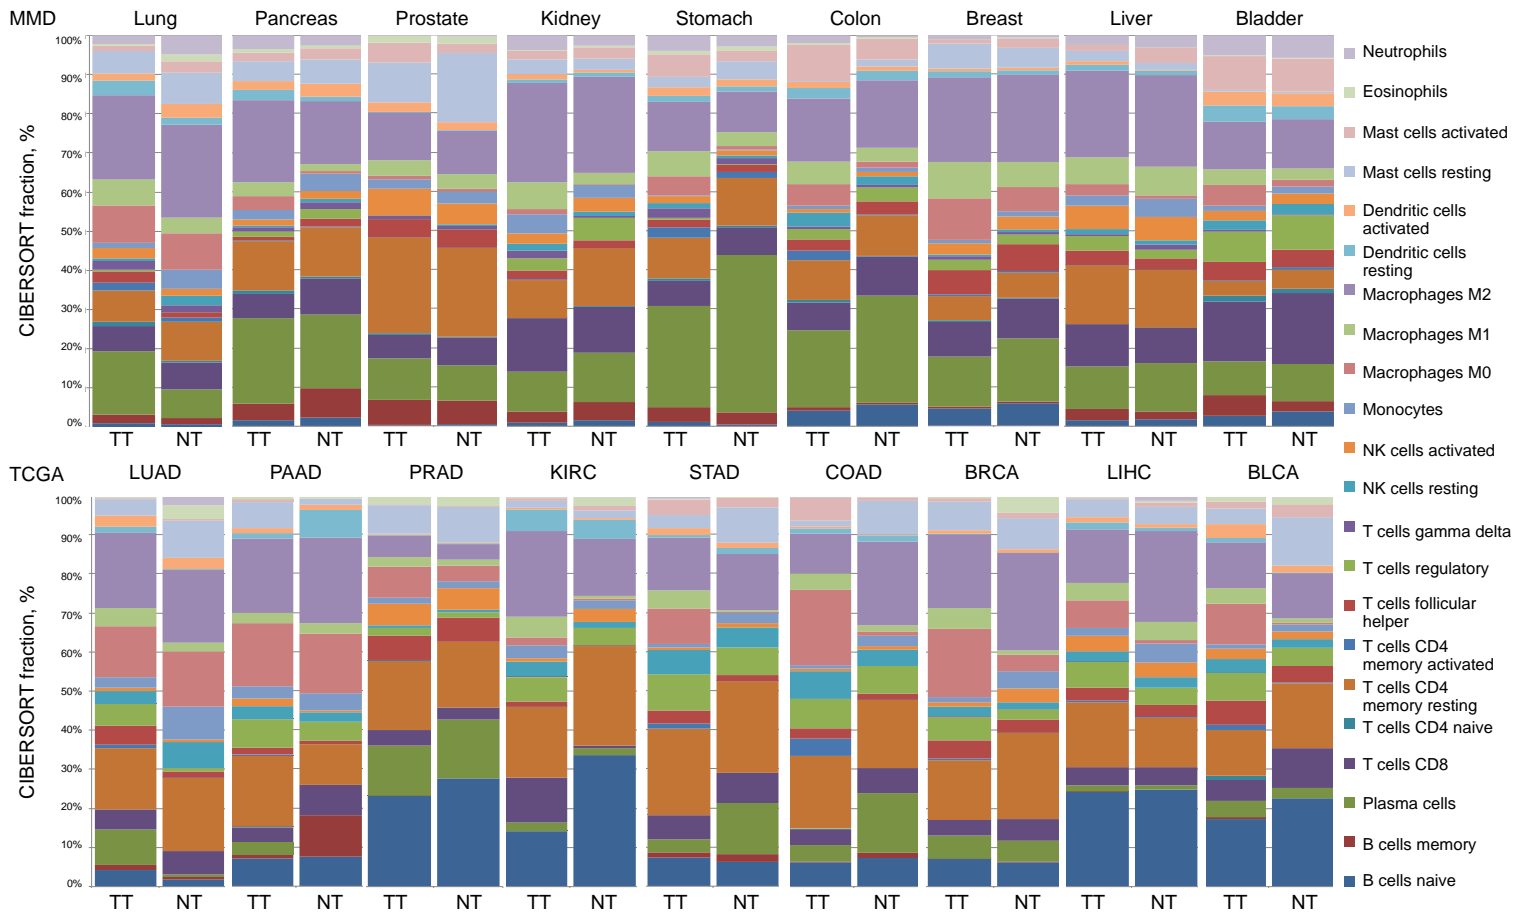

**Fig. S6. CIBERSORT analysis.** The relative fractions of 22 immune cell types are shown for TT and NT group across MMD (top) and TCGA (bottom) datasets.

## Supplementary Tables

**Table S1. Summary of MMD and TCGA datasets.** N = sample size; TT = tumor tissue; NT = non-tumor tissue.

| Cancer type         | Lung     |          | Pancreas | Prostate | Kidney   |          |          |
|---------------------|----------|----------|----------|----------|----------|----------|----------|
| GEO accession codes | GSE10245 |          | GSE15471 | GSE17906 | GSE36895 |          |          |
|                     | GSE10445 |          | GSE16515 | GSE17951 | GSE23629 |          |          |
|                     | GSE10799 |          | GSE22780 | GSE26910 | GSE11151 |          |          |
|                     | GSE12667 |          | GSE32676 | GSE3325  | GSE53757 |          |          |
|                     | GSE18842 |          |          | GSE45016 | GSE12606 |          |          |
|                     | GSE19188 |          |          | GSE55945 | GSE12090 |          |          |
|                     | GSE28571 |          |          |          |          |          |          |
|                     | GSE30219 |          |          |          |          |          |          |
|                     | GSE31210 |          |          |          |          |          |          |
|                     | GSE33356 |          |          |          |          |          |          |
|                     | GSE37745 |          |          |          |          |          |          |
|                     | GSE50081 |          |          |          |          |          |          |
| Total N             | 1621     |          | 178      | 237      | 323      |          |          |
| TT N                | 1474     |          | 108      | 121      | 219      |          |          |
| NT N                | 147      |          | 70       | 116      | 104      |          |          |
| TCGA                | LUAD     | LUSC     | PAAD     | PRAD     | KICH     | KIRC     | KIRP     |
| Total N             | 574      | 553      | 182      | 549      | 90       | 606      | 323      |
| TT N                | 515      | 502      | 178      | 482      | 65       | 533      | 291      |
| NT N                | 59       | 51       | 4        | 67       | 25       | 73       | 32       |
| Cancer type         | Stomach  | Colon    | Ovary    | Breast   | Liver    | Bladder  | Melanoma |
| GEO accession codes | GSE13911 | GSE13067 | GSE10971 | GSE10780 | GSE29721 | GSE30522 | GSE15605 |
|                     | GSE15459 | GSE13294 | GSE12172 | GSE12276 | GSE40873 | GSE31189 | GSE19234 |
|                     | GSE19826 | GSE14333 | GSE14001 | GSE16446 | GSE41804 | GSE31684 | GSE23376 |
|                     | GSE34942 | GSE15960 | GSE14407 | GSE18864 | GSE45436 | GSE7476  | GSE7553  |
|                     | GSE35809 | GSE17536 | GSE15578 | GSE19615 | GSE6222  |          |          |
|                     | GSE38749 | GSE17537 | GSE18520 | GSE20685 | GSE62232 |          |          |
|                     | GSE62254 | GSE18088 | GSE19352 | GSE20711 | GSE75271 |          |          |
|                     |          | GSE18105 | GSE19829 | GSE21653 |          |          |          |
|                     |          | GSE20916 | GSE30161 | GSE22513 |          |          |          |
|                     |          | GSE23878 | GSE9899  | GSE23177 |          |          |          |
|                     |          | GSE26682 |          | GSE23593 |          |          |          |
|                     |          | GSE33113 |          | GSE26639 |          |          |          |
|                     |          | GSE4107  |          | GSE28796 |          |          |          |
|                     |          | GSE4183  |          | GSE28821 |          |          |          |
|                     |          | GSE9348  |          | GSE3744  |          |          |          |
|                     |          |          |          | GSE42568 |          |          |          |
|                     |          |          |          | GSE50567 |          |          |          |
|                     |          |          |          | GSE5764  |          |          |          |

GSE7904

GSE9195

|         |      |      |     |      |      |      |      |
|---------|------|------|-----|------|------|------|------|
| Total N | 737  | 1514 | 647 | 2302 | 401  | 212  | 214  |
| TT N    | 691  | 1393 | 593 | 2088 | 244  | 161  | 194  |
| NT N    | 46   | 121  | 54  | 214  | 157  | 51   | 20   |
| TCGA    | STAD | COAD | OV  | BRCA | LIHC | BLCA | SKCM |
| Total N | 450  | 327  | 304 | 1207 | 421  | 427  | 103  |
| TT N    | 415  | 286  | 304 | 1094 | 371  | 408  | 102  |
| NT N    | 35   | 41   | 0   | 113  | 50   | 19   | 1    |



**Table S2. Summary of 95 GEO datasets used in MMD generation.** N = sample size; TT = tumor tissue; NT = non-tumor tissue.

| Organ  | Dataset  | NT N | TT N | Organ    | Dataset  | NT N | TT N | Organ   | Dataset  | NT N | TT N |
|--------|----------|------|------|----------|----------|------|------|---------|----------|------|------|
| Lung   | GSE10245 | 0    | 58   | Colon    | GSE9348  | 12   | 70   | Bladder | GSE7476  | 3    | 9    |
| Lung   | GSE10445 | 0    | 72   | Pancreas | GSE15471 | 39   | 39   | Breast  | GSE10780 | 143  | 42   |
| Lung   | GSE10799 | 3    | 16   | Pancreas | GSE16515 | 16   | 36   | Breast  | GSE12276 | 0    | 204  |
| Lung   | GSE12667 | 0    | 75   | Pancreas | GSE22780 | 8    | 8    | Breast  | GSE16446 | 0    | 120  |
| Lung   | GSE18842 | 45   | 46   | Pancreas | GSE32676 | 5    | 25   | Breast  | GSE18864 | 0    | 84   |
| Lung   | GSE19188 | 65   | 91   | Prostate | GSE17906 | 10   | 12   | Breast  | GSE19615 | 0    | 115  |
| Lung   | GSE28571 | 0    | 100  | Prostate | GSE17951 | 86   | 68   | Breast  | GSE20685 | 0    | 327  |
| Lung   | GSE30219 | 14   | 293  | Prostate | GSE26910 | 0    | 6    | Breast  | GSE20711 | 2    | 88   |
| Lung   | GSE31210 | 20   | 226  | Prostate | GSE3325  | 0    | 13   | Breast  | GSE21653 | 0    | 266  |
| Lung   | GSE33356 | 0    | 120  | Prostate | GSE45016 | 1    | 10   | Breast  | GSE22513 | 0    | 28   |
| Lung   | GSE37745 | 0    | 196  | Prostate | GSE55945 | 7    | 0    | Breast  | GSE23177 | 0    | 116  |
| Lung   | GSE50081 | 0    | 181  | Stomach  | GSE13911 | 31   | 38   | Breast  | GSE23593 | 0    | 50   |
| Kidney | GSE11151 | 5    | 62   | Stomach  | GSE15459 | 0    | 200  | Breast  | GSE26639 | 0    | 226  |
| Kidney | GSE12090 | 0    | 18   | Stomach  | GSE19826 | 15   | 12   | Breast  | GSE28796 | 0    | 24   |
| Kidney | GSE12606 | 4    | 6    | Stomach  | GSE34942 | 0    | 56   | Breast  | GSE28821 | 0    | 89   |
| Kidney | GSE23629 | 0    | 32   | Stomach  | GSE35809 | 0    | 70   | Breast  | GSE3744  | 7    | 40   |
| Kidney | GSE36895 | 23   | 29   | Stomach  | GSE38749 | 0    | 15   | Breast  | GSE42568 | 17   | 104  |
| Kidney | GSE53757 | 72   | 72   | Stomach  | GSE62254 | 0    | 300  | Breast  | GSE50567 | 6    | 35   |
| Colon  | GSE13067 | 0    | 74   | Liver    | GSE29721 | 10   | 10   | Breast  | GSE5764  | 20   | 10   |
| Colon  | GSE13294 | 0    | 155  | Liver    | GSE40873 | 49   | 0    | Breast  | GSE7904  | 19   | 43   |
| Colon  | GSE14333 | 0    | 290  | Liver    | GSE41804 | 20   | 20   | Breast  | GSE9195  | 0    | 77   |
| Colon  | GSE15960 | 0    | 6    | Liver    | GSE45436 | 41   | 93   | Ovary   | GSE10971 | 24   | 13   |
| Colon  | GSE17536 | 0    | 177  | Liver    | GSE6222  | 2    | 10   | Ovary   | GSE12172 | 0    | 90   |
| Colon  | GSE17537 | 0    | 55   | Liver    | GSE62232 | 10   | 81   | Ovary   | GSE14001 | 0    | 20   |
| Colon  | GSE18088 | 0    | 53   | Liver    | GSE75271 | 5    | 50   | Ovary   | GSE14407 | 12   | 12   |
| Colon  | GSE18105 | 27   | 94   | Melanoma | GSE15605 | 16   | 46   | Ovary   | GSE15578 | 6    | 4    |
| Colon  | GSE20916 | 44   | 91   | Melanoma | GSE19234 | 0    | 44   | Ovary   | GSE18520 | 10   | 53   |
| Colon  | GSE23878 | 24   | 35   | Melanoma | GSE23376 | 0    | 22   | Ovary   | GSE19352 | 2    | 20   |
| Colon  | GSE26682 | 0    | 176  | Melanoma | GSE7553  | 4    | 82   | Ovary   | GSE19829 | 0    | 28   |
| Colon  | GSE33113 | 6    | 90   | Bladder  | GSE30522 | 8    | 7    | Ovary   | GSE30161 | 0    | 58   |
| Colon  | GSE4107  | 10   | 12   | Bladder  | GSE31189 | 40   | 52   | Ovary   | GSE9899  | 0    | 295  |
| Colon  | GSE4183  | 8    | 15   | Bladder  | GSE31684 | 0    | 93   |         |          |      |      |

**Table S3. Summary of MMD and TCGA data processing and overlapping genes.** N = sample size.

| TCGA dataset | Initial gene N | After filtering | MMD dataset | Initial gene N | Overlapping gene N with TCGA ranked list of differentially expressed genes |
|--------------|----------------|-----------------|-------------|----------------|----------------------------------------------------------------------------|
| LUAD         | 20474          | 15404           | Lung        | 20546          | 14101                                                                      |
| PAAD         | 20474          | 15533           | Pancreas    | 20546          | 14239                                                                      |
| PRAD         | 20474          | 14976           | Prostate    | 20546          | 13720                                                                      |
| KIRC         | 20474          | 15131           | Kidney      | 20545          | 13852                                                                      |
| STAD         | 20474          | 15418           | Stomach     | 20546          | 14104                                                                      |
| COAD         | 20474          | 14785           | Colon       | 20546          | 13571                                                                      |
| BRCA         | 20474          | 15165           | Breast      | 20546          | 13887                                                                      |
| LIHC         | 20474          | 14138           | Liver       | 20546          | 13022                                                                      |
| BLCA         | 20474          | 15033           | Bladder     | 20546          | 13771                                                                      |
| OV           | 20474          | 15480           | Ovary       | 20546          | NA                                                                         |
| SKCM         | 20474          | 14747           | Melanoma    | 20546          | NA                                                                         |

**Table S4. Summary of multi-gene classifiers used in DE and RRHO analyses.**

| Original signature | Kidney MMD   | TCGA KIRC | Reference                                                                                                                                                                                                                                                                                 | Original signature | Stomach MMD        | TCGA STAD |
|--------------------|--------------|-----------|-------------------------------------------------------------------------------------------------------------------------------------------------------------------------------------------------------------------------------------------------------------------------------------------|--------------------|--------------------|-----------|
| NR3C2              | NR3C2        | NR3C2     | Bhalla S, Chaudhary K, Kumar R, Sehgal M, Kaur H, Sharma S, Raghava GP: Gene expression-based biomarkers for discriminating early and late stage of clear cell renal cancer. Sci Rep 2017, 7:44997.                                                                                       | NR112              | NR112              | NR112     |
| ENAM               | ENAM         | ENAM      |                                                                                                                                                                                                                                                                                           | LGALS1             | LGALS1             | LGALS1    |
| DNASE1L3           | DNASE1L3     | DNASE1L3  |                                                                                                                                                                                                                                                                                           | C10RF198           | CST2               | CST2      |
| MAP6D1             | MAP6D1       | MAP6D1    |                                                                                                                                                                                                                                                                                           | CST2               | LAMP5              | LAMP5     |
| SMPD4              |              | SMPD4     |                                                                                                                                                                                                                                                                                           | LAMP5              | FOXS1              | FOXS1     |
| C11orf73           |              |           |                                                                                                                                                                                                                                                                                           | FOXS1              | CES1P1             | MMP7      |
| PLEKHA9            |              |           |                                                                                                                                                                                                                                                                                           | CES1P1             | MMP7               | COL8A1    |
| FRMPD2             |              |           |                                                                                                                                                                                                                                                                                           | MMP7               | COL8A1             |           |
|                    |              |           |                                                                                                                                                                                                                                                                                           | COL8A1             |                    |           |
|                    |              |           |                                                                                                                                                                                                                                                                                           |                    |                    |           |
| Original signature | Lung MMD     | TCGA LUAD | Reference                                                                                                                                                                                                                                                                                 | Original signature | Bladder MMD        | TCGA BLCA |
| BAG1               | BAG1         | BAG1      | Kratz JR, He J, Van Den Eeden SK, Zhu ZH, Gao W, Pham PT, Mulvihill MS, Ziaei F, Zhang H, Su B, et al.: A practical molecular assay to predict survival in resected non-squamous, non-small-cell lung cancer: development and international validation studies. Lancet 2012, 379:823-832. | S100A8             | S100A8             | S100A8    |
| BRCA1              | BRCA1        | ERBB3     |                                                                                                                                                                                                                                                                                           | CELSR3             | CELSR3             | CELSR3    |
| CDC6               | CDC6         | FUT3      |                                                                                                                                                                                                                                                                                           | PFKFB4             | PFKFB4             | PFKFB4    |
| CDK2AP1            | CDK2AP1      | WNT3A     |                                                                                                                                                                                                                                                                                           | HMOX1              | HMOX1              | HMOX1     |
| ERBB3              | ERBB3        | BRCA1     |                                                                                                                                                                                                                                                                                           | MTAP               | MTAP               | MTAP      |
| FUT3               | FUT3         | CDC6      |                                                                                                                                                                                                                                                                                           | MGC17624           | KIF1A              | KIF1A     |
| IL11               | IL11         | CDK2AP1   |                                                                                                                                                                                                                                                                                           | KIF1A              | COCH               | COCH      |
| LCK                | LCK          | IL11      |                                                                                                                                                                                                                                                                                           | COCH               |                    |           |
| RND3               | RND3         | LCK       |                                                                                                                                                                                                                                                                                           |                    |                    |           |
| SH3BGR             |              | RND3      |                                                                                                                                                                                                                                                                                           |                    |                    |           |
| WNT3A              |              |           |                                                                                                                                                                                                                                                                                           |                    |                    |           |
|                    |              |           |                                                                                                                                                                                                                                                                                           |                    |                    |           |
| Original signature | Pancreas MMD | TCGA PAAD |                                                                                                                                                                                                                                                                                           | Reference          | Original signature | Colon MMD |
| GPR87              | GPR87        | GPR87     | Birnbau DJ, Finetti P, Lopresti A, Gilabert M, Poizat F, Raoul JL, Delpero JR, Moutardier V, Birnbau D, Mamessier E, et al.: A 25-gene classifier predicts overall survival in resectable pancreatic cancer. BMC Med 2017, 15:170.                                                        | MCTP1              | MCTP1              | MCTP1     |
| KRT13              | KRT13        | KRT13     |                                                                                                                                                                                                                                                                                           | LAMA3              | LAMA3              | LAMA3     |
| RAC2               | RAC2         | RAC2      |                                                                                                                                                                                                                                                                                           | CTSC               | CTSC               | CTSC      |
| C16orf74           | C16orf74     | C16orf74  |                                                                                                                                                                                                                                                                                           | PYROXD1            | PYROXD1            | PYROXD1   |
| NAMPT              | NAMPT        | NAMPT     |                                                                                                                                                                                                                                                                                           | EDEM1              | EDEM1              | EDEM1     |
| DHRS9              | DHRS9        | DHRS9     |                                                                                                                                                                                                                                                                                           | IL2RB              | IL2RB              | IL2RB     |
| HIST2H2BF          | TREM2        | HIST2H2BF |                                                                                                                                                                                                                                                                                           | ZNF697             | ZNF697             | ZNF697    |
| TREM2              | ZDHHC20      | TREM2     |                                                                                                                                                                                                                                                                                           | SLC6A11            | SLC6A11            | IL2RA     |
| ZDHHC20            | CD180        | ZDHHC20   |                                                                                                                                                                                                                                                                                           | IL2RA              | IL2RA              | CYFIP2    |
| CD180              | ADGRG6       | CD180     |                                                                                                                                                                                                                                                                                           | CYFIP2             | CYFIP2             | PIM3      |
| ADGRG6             | APBB1IP      | ADGRG6    |                                                                                                                                                                                                                                                                                           | PIM3               | PIM3               | LIF       |
| APBB1IP            | EGR3         | APBB1IP   |                                                                                                                                                                                                                                                                                           | LIF                | LIF                | PLIN3     |
| EGR3               | MACROD2      | EGR3      |                                                                                                                                                                                                                                                                                           | PLIN3              | PLIN3              | ZBED4     |
| MACROD2            | EPHA7        | MACROD2   |                                                                                                                                                                                                                                                                                           | HSD3B1             | HSD3B1             | PPARA     |
| EPHA7              | RASGEF1A     | EPHA7     |                                                                                                                                                                                                                                                                                           | ZBED4              | ZBED4              | THNSL2    |
| RASGEF1A           | SYNM         | RASGEF1A  |                                                                                                                                                                                                                                                                                           | PPARA              | PPARA              |           |
| SYNM               | S100A1       | SYNM      |                                                                                                                                                                                                                                                                                           | THNSL2             | THNSL2             |           |
| S100A1             | WNK2         | S100A1    |                                                                                                                                                                                                                                                                                           | CA4388O2           |                    |           |
| WNK2               | RAMP2        | WNK2      |                                                                                                                                                                                                                                                                                           | Original signature | Liver MMD          | TCGA LIHC |
| RAMP2              | SOCS2        | RAMP2     |                                                                                                                                                                                                                                                                                           | AHCYL2             | AHCYL2             | AHCYL2    |

| SOCS2              | COL28A1      | SOCS2     |                                                                                                                                                                                                                                                                               | LAMP2              | LAMP2      | LAMP2     |  |
|--------------------|--------------|-----------|-------------------------------------------------------------------------------------------------------------------------------------------------------------------------------------------------------------------------------------------------------------------------------|--------------------|------------|-----------|--|
| COL28A1            | B4GALT6      | COL28A1   |                                                                                                                                                                                                                                                                               | SPRY1              | SPRY1      | SPRY1     |  |
| B4GALT6            | PLCB4        | B4GALT6   |                                                                                                                                                                                                                                                                               | SERPINA7           | SERPINA7   | SERPINA7  |  |
| PLCB4              | MTURN        | PLCB4     |                                                                                                                                                                                                                                                                               | FGGY               | FGGY       | FGGY      |  |
| MTURN              |              | MTURN     |                                                                                                                                                                                                                                                                               | ASLNC16648         |            |           |  |
| Original signature | Prostate MMD | TCGA PRAD | Reference                                                                                                                                                                                                                                                                     | Original signature | Breast MMD | TCGA BRCA |  |
| LASP1              | LASP1        | LASP1     | Erho N, Crisan A, Vergara IA, Mitra AP, Ghadessi M, Buerki C, Bergstralh EJ, Kollmeyer T, Fink S, Haddad Z, et al.: Discovery and validation of a prostate cancer genomic classifier that predicts early metastasis following radical prostatectomy. PLoS One 2013, 8:e66855. | AURKA              | LASP1      | MMP11     |  |
| IQGAP3             | IQGAP3       | IQGAP3    |                                                                                                                                                                                                                                                                               | BAG1               | IQGAP3     | GRB7      |  |
| NFIB               | NFIB         | NFIB      |                                                                                                                                                                                                                                                                               | BCL2               | S1PR4      | ERBB2     |  |
| S1PR4              | S1PR4        | S1PR4     |                                                                                                                                                                                                                                                                               | BIRC5              | THBS2      | ESR1      |  |
| THBS2              | THBS2        | THBS2     |                                                                                                                                                                                                                                                                               | CCNB1              | EPPK1      | PGR       |  |
| ANO7               | ANO7         | ANO7      |                                                                                                                                                                                                                                                                               | CD68               | NUSAP1     | BCL2      |  |
| PCDH7              | PCDH7        | PCDH7     |                                                                                                                                                                                                                                                                               | CTSL2              | ZWILCH     | SCUBE2    |  |
| MYBPC1             | MYBPC1       | MYBPC1    |                                                                                                                                                                                                                                                                               | ERBB2              | UBE2C      | GSTM1     |  |
| EPPK1              | EPPK1        | EPPK1     |                                                                                                                                                                                                                                                                               | ESR1               | NFIB       | BAG1      |  |
| TSBP               | PBX1         | PBX1      |                                                                                                                                                                                                                                                                               | GRB7               | ANO7       | MKI67     |  |
| PBX1               | NUSAP1       | NUSAP1    |                                                                                                                                                                                                                                                                               | GSTM1              | PCDH7      | AURKA     |  |
| NUSAP1             | ZWILCH       | ZWILCH    |                                                                                                                                                                                                                                                                               | MKI67              | MYBPC1     | BIRC5     |  |
| ZWILCH             | UBE2C        | UBE2C     |                                                                                                                                                                                                                                                                               | MMP11              | PBX1       | CCNB1     |  |
| UBE2C              | CAMK2N1      | CAMK2N1   |                                                                                                                                                                                                                                                                               | MYBL2              | CAMK2N1    | MYBL2     |  |
| CAMK2N1            | RABGAP1      | RABGAP1   |                                                                                                                                                                                                                                                                               | PGR                | RABGAP1    | CD68      |  |
| RABGAP1            | TNFRSF19     | TNFRSF19  |                                                                                                                                                                                                                                                                               | SCUBE2             | TNFRSF19   |           |  |
| PCAT-32            |              |           |                                                                                                                                                                                                                                                                               |                    |            |           |  |
| GLYATL1P4/PCAT-80  |              |           |                                                                                                                                                                                                                                                                               |                    |            |           |  |
| TNFRSF19           |              |           |                                                                                                                                                                                                                                                                               |                    |            |           |  |

**Table S5. Summary of MMD-derived differentially expressed genes.** N = sample size.

| Cancer type | Up-regulated genes N | Down-regulated gene N | Non-significant genes N |
|-------------|----------------------|-----------------------|-------------------------|
| Bladder     | 1                    | 0                     | 20545                   |
| Breast      | 6                    | 13                    | 20527                   |
| Colon       | 86                   | 167                   | 20293                   |
| Stomach     | 39                   | 99                    | 20408                   |
| Liver       | 113                  | 289                   | 201                     |
| Melanoma    | 392                  | 860                   | 19294                   |
| Ovary       | 35                   | 68                    | 20443                   |
| Pancreas    | 570                  | 136                   | 19840                   |
| Prostate    | 147                  | 223                   | 20176                   |
| Lung        | 267                  | 555                   | 19724                   |
| Kidney      | 662                  | 743                   | 19141                   |

**Table S6. Summary of multi-gene classifiers used in ROC analyses.**

| Cancer type | MGT        | Original signature                                                                                                                                                                                                                                                                                                                                                                                                                      | Lung or Breast MMD                                                                                                                                                                                                                                                                                                                                       | Reference                                                                                                                                                                                                       | Computation method                                                                                                                                            |
|-------------|------------|-----------------------------------------------------------------------------------------------------------------------------------------------------------------------------------------------------------------------------------------------------------------------------------------------------------------------------------------------------------------------------------------------------------------------------------------|----------------------------------------------------------------------------------------------------------------------------------------------------------------------------------------------------------------------------------------------------------------------------------------------------------------------------------------------------------|-----------------------------------------------------------------------------------------------------------------------------------------------------------------------------------------------------------------|---------------------------------------------------------------------------------------------------------------------------------------------------------------|
| Lung        | myplan™    | ASPM, CDCA8, MCM10, FOXM1, CDC20, CDKN3, BIRC5, DLGAP5, KIF20A, BUB1B, PRC1, TK1, CEP55, PBK, RAD54L, NUSAP1, RRM2, KIAA0101, ORC6L, RAD51, CENPM, SKA1, CENPF, KIF11, PTTG1, CDC2, DTL, PLK1, CDCA3, ASF1B, TOP2A                                                                                                                                                                                                                      | ASPM, CDCA8, MCM10, CDC20, CDKN3, BIRC5, DLGAP5, KIF20A, BUB1B, PRC1, TK1, CEP55, PBK, RAD54L, NUSAP1, RRM2, KIAA0101, RAD51, CENPM, SKA1, CENPF, KIF11, PTTG1, DTL, PLK1, CDCA3, ASF1B, TOP2A                                                                                                                                                           | Bueno, R. et al. Validation of a molecular and pathological model for five-year mortality risk in patients with early stage lung adenocarcinoma. <i>J Thorac Oncol</i> 10, 67-73, (2015).                       | Unweighted average                                                                                                                                            |
| Lung        | Pervenio   | BAG1, BRCA1, CDC6, CDK2AP1, ERBB3, FUT3, IL11, LCK, RND3, SH3BGR, WNT3A                                                                                                                                                                                                                                                                                                                                                                 | BAG1, BRCA1, CDC6, CDK2AP1, ERBB3, FUT3, IL11, LCK, RND3, SH3BGR                                                                                                                                                                                                                                                                                         | Kratz, J. R. et al. A practical molecular assay to predict survival in resected non-squamous, non-small-cell lung cancer: development and international validation studies. <i>Lancet</i> 379, 823-832, (2012). | Expression value of each gene was multiplied by predefined Cox proportional hazards model coefficients and the sum of these values represents the final index |
| Breast      | MammaPrint | AA555029_RC, AKAP2, ALDH4A1, AP2B1, AYTL2, BBC3, C16orf61, C20orf46, c9orf30, CCNE2, CDC42BPA, CDCA7, CEGP1, CENPA, COL4A2, DCK, DIAPH3, DTL, EBF4, ECT2, EGLN1, ESM1, EXT1, FGF18, FLT1, GMPS, GNAZ, GPR126, GPR180, GSTM3, HRASLS, IGFBP5, JHDM1D, KNTC2, LGP2, LIN9, LOC100131053, LOC100288906, MCM6, MELK, MMP9, MS4A7, MTDH, NMU, NUSAP1, ORC6L, OXCT1, PAML2, Peci, PITRM1, PRC1, QSCN6L1, RAB6B, RASSF7, RECQL5, RFC4, RTN4RL1, | AA555029_RC, AP2B1, CCNE2, CDC42BPA, CDCA7, CENPA, COL4A2, DCK, DIAPH3, DTL, EBF4, ECT2, EGLN1, ESM1, EXT1, FGF18, FLT1, GMPS, GNAZ, GPR180, GSTM3, HRASLS, IGFBP5, LIN9, LOC100131053, MCM6, MELK, MMP9, MS4A7, MTDH, NMU, NUSAP1, OXCT1, PAML2, PITRM1, PRC1, RAB6B, RASSF7, RECQL5, RFC4, RTN4RL1, RUND1, SLC2A3, STK32B, TGFB3, TSPYL5, UCHL5, WISP1 | Marquart, J., Chen, E. Y. & Prasad, V. Estimation of the Percentage of US Patients With Cancer Who Benefit From Genome-Driven Oncology. <i>JAMA Oncol</i> 4, 1093-1098, (2018).                                 | Unweighted average                                                                                                                                            |

RUNDC1, SERF1A,  
SLC2A3, STK32B,  
TGFB3, TSPYL5,  
UCHL5, WISP1,  
ZNF533

Breast Oncotype DX

AURKA, BAG1, BCL2,  
BIRC5, CCNB1,  
CD68, CTSL2,  
ERBB2, ESR1, GRB7,  
GSTM1, MKI67,  
MMP11, MYBL2,  
PGR, SCUBE2

AURKA, BAG1, BCL2,  
BIRC5, CCNB1,  
ERBB2, ESR1, GRB7,  
GSTM1, MKI67,  
MMP11, MYBL2,  
PGR, SCUBE2

Sparano, J. A. et al.  
Prospective  
Validation of a 21-  
Gene Expression  
Assay in Breast  
Cancer. The New  
England journal of  
medicine 373, 2005-  
2014, (2015).

Expression  
value of each  
gene was  
multiplied by  
predefined Cox  
proportional  
hazards model  
coefficients and  
the sum of  
these values  
represents the  
final index

---
